# Supplementary material for: Determining the contributions of protein synthesis and breakdown to muscle atrophy requires non‐steady‐state equations
Source: PubMed Central journal article supplement (PMC8718081; doi:10.1002/jcsm.12772), 2021-08-21

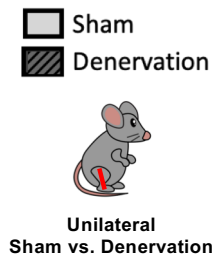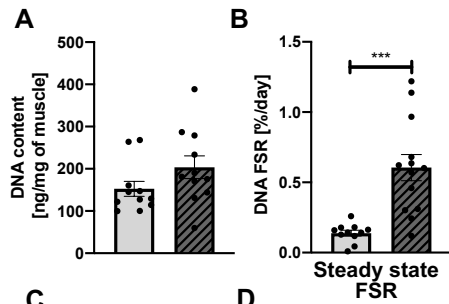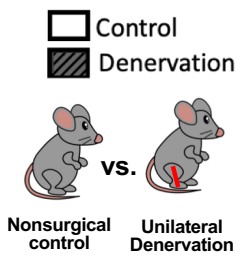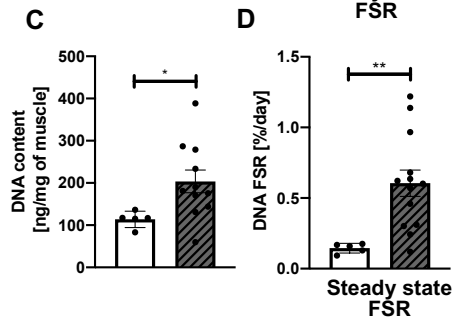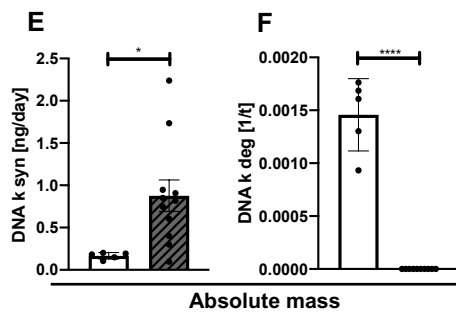

Supplement: JCSM-12-1764-s001.pdf [file JCSM-12-1764-s001.pdf]
